## **Spatial and Temporal Analysis of the Stomach and Small Intestinal Microbiota in Fasted Healthy Humans**

Authors: Anna M. Seekatz, PhD<sup>1\*</sup>, Matthew K. Schnizlein<sup>2\*</sup>, Mark J. Koenigskecht, PhD<sup>1,3\*</sup>, Jason R. Baker, PhD<sup>4</sup>, William L. Hasler, MD<sup>4</sup>, Barry E. Bleske, PharmD<sup>5</sup>, Vincent B. Young, MD, PhD<sup>1,2†</sup>, Duxin Sun, PhD<sup>3†</sup>

<sup>1</sup>*Department of Internal Medicine, Division of Infectious Disease, University of Michigan, Ann Arbor, MI 48109, USA*

<sup>2</sup>*Department of Microbiology and Immunology, University of Michigan, Ann Arbor, MI 48109, USA*

<sup>3</sup>*Department of Pharmaceutical Sciences, College of Pharmacy, University of Michigan, Ann Arbor, MI 48109, USA*

<sup>4</sup>*Department of Internal Medicine, Division of Gastroenterology and Hepatology, University of Michigan, Ann Arbor, MI 48109, USA*

<sup>5</sup>*Department of Pharmacy Practice and Administrative Sciences, University of New Mexico, Albuquerque, NM 87131*

\*These authors contributed equally

†Corresponding authors

### **Contact information:**

Duxin Sun, PhD

*Department of Pharmaceutical Sciences, College of Pharmacy, University of Michigan, Ann Arbor, MI 48109, USA, [duxins@umich.edu](mailto:duxins@umich.edu)*

Vincent B. Young, MD, PhD

*Department of Internal Medicine, Division of Infectious Disease, University of Michigan, Ann Arbor, MI 48109, USA, [youngvi@umich.edu](mailto:youngvi@umich.edu)*

**Manuscript word count:** 3105

**Patient consent:** Informed consent was obtained from individuals prior to the time of sampling. IRB approved on 02/04/2015.

**Conflicts of Interest:** None

## 1 **Abstract**

2           Although the microbiota in the proximal gastrointestinal (GI) tract has been  
3 implicated in health and disease, much of these microbes remains understudied  
4 compared to the distal GI tract. This study characterized the microbiota across  
5 multiple proximal GI sites over time in healthy individuals.

6           As part of a study of the pharmacokinetics of oral mesalamine  
7 administration, healthy, fasted volunteers (N=8; 10 observation periods total) were  
8 orally intubated with a four-lumen catheter with multiple aspiration ports. Samples  
9 were taken from stomach, duodenal, and multiple jejunal sites, sampling hourly ( $\leq 7$   
10 hours) to measure mesalamine (administered at  $t=0$ ), pH, and 16S rRNA gene-based  
11 composition.

12           We observed a predominance of Firmicutes across proximal GI sites, with  
13 significant variation compared to stool. The microbiota was more similar within  
14 individuals over time than between subjects, with the fecal microbiota being unique  
15 from that of the small intestine. The stomach and duodenal microbiota displayed  
16 highest intra-individual variability compared to jejunal sites, which were more  
17 stable across time. We observed significant correlations in the duodenal microbial  
18 composition with changes in pH; linear mixed models identified positive  
19 correlations with multiple *Streptococcus* operational taxonomic units (OTU) and  
20 negative correlations with multiple *Prevotella* and *Pasteurellaceae* OTUs. Few OTUs  
21 correlated with mesalamine concentration.

22           The stomach and duodenal microbiota exhibited greater compositional  
23 dynamics compared to the jejunum. Short-term fluctuations in the duodenal

24 microbiota was correlated with pH. Given the unique characteristics and dynamics  
25 of the proximal GI tract microbiota, it is important to consider these local  
26 environments in health and disease states.

27

28

## 29 INTRODUCTION

30 The microbiota of the proximal gastrointestinal tract in humans represent an  
31 understudied yet highly relevant microbial community.<sup>1</sup> Physiological processes  
32 such as gastric emptying, bile acid secretion, and the transit of food can influence  
33 the proximal gastrointestinal (GI) tract and disease development.<sup>2-5</sup> However, our  
34 current understanding of how the processes and microbiota in different regions of  
35 the proximal GI tract relate to health and disease remains limited compared to other  
36 areas of the GI tract.

37 Much of our knowledge about the involvement of the human GI microbiota in  
38 health and disease has relied on fecal sampling, a non-invasive sampling method  
39 that is largely representative of the large intestine.<sup>6,7</sup> Although it is known that the  
40 microbiota across the GI tract varies in composition and density,<sup>8-10</sup> studying the  
41 microbiota at these sites is difficult, limiting our knowledge to invasive procedures,  
42 specific patient populations, or single time points.<sup>1</sup> Analyses of mucosal samples  
43 from autopsies, endoscopies, and colonoscopies have revealed that *Streptococci* and  
44 *Lactobacilli*, both members of the oral and esophageal microbiota, are abundant  
45 members of the jejunal and ileal microbiota.<sup>11-17</sup> Studies using naso-ileal catheters  
46 and ileostoma effluent, which allow collection over time, have supported these  
47 conclusions and revealed that the small intestinal microbiota is highly dynamic over  
48 short time courses, likely reflective of physiological processes at the stomach-small  
49 intestine interface.<sup>18-21</sup>

50 Understanding how these microbiota along the GI tract are related is of  
51 physiological relevance, particularly in relation to intestinal homeostasis and

52 disease. Recent evidence suggests that the drug mesalamine, designed to reach high  
53 concentrations in the GI tract as treatment for irritable bowel disease (IBD), may  
54 directly target the microbiota in addition to host effectors.<sup>22,23</sup> It is possible that  
55 some of the effectiveness of mesalamine treatment for IBD is mediated by the  
56 microbiota, potentiating the need to characterize these microbial communities to a  
57 fuller extent in the context of mesalamine administration.

58         This study investigated the bacterial composition across the intact upper GI  
59 tract in the same healthy, fasted adults over time. We used a multi-lumen tube  
60 designed to sample multiple sites along the upper GI tract. As part of a previously  
61 published study aimed at measuring mesalamine dissolution, subjects were given a  
62 dose of mesalamine and the proximal GI tract lumen was sampled over time.<sup>24</sup> We  
63 used these samples to 1) characterize and compare microbial community dynamics  
64 over time at multiple upper GI sites within an individual and 2) identify how  
65 environmental factors, such as pH and the acute effect of mesalamine, shaped the  
66 microbiota. To the best of our knowledge, this is the first study to characterize the  
67 luminal microbiota across multiple upper GI sites over time within the same  
68 individual.

69

## 70 **METHODS**

### 71 **Study recruitment**

72         Healthy individuals (age 18-55) were included who were free of medications  
73 for the past two weeks, passed routine health screening, had a BMI 18.5-35, and had  
74 no significant clinical illness within three weeks. Health screening included a review

75 of medical history and a physical examination (checking vital signs,  
76 electrocardiography, and clinical laboratory tests) described in Yu et al.<sup>24</sup>

### 77 **Catheter design and sterilization**

78 A customized multi-channel catheter was constructed by Arndorfer Inc.  
79 (Greendale, WI), consisting of independent aspiration ports located 50 cm apart.  
80 The catheter had a channel to fit a (0.035 in x 450 cm) guidewire (Boston Scientific,  
81 Marlborough, MA), a channel connected to a balloon that could be filled with 7 ml of  
82 water to assist tube placement, and an end that was weighted with 7.75 grams of  
83 tungsten. Each single-use catheter was sterilized according to guidelines set by the  
84 American Society for Gastrointestinal Endoscopy at the University of Michigan prior  
85 to insertion (Supplemental Methods).<sup>25</sup>

### 86 **Collection of GI fluid samples**

87 The full details of catheter placement have been previously described.<sup>24</sup>  
88 Briefly, catheter placement occurred approximately 12 hours before sample  
89 collection. The catheter was orally inserted into the GI tract with aspiration ports  
90 located in the stomach, duodenum, and the proximal, mid and distal jejunum,  
91 confirmed by fluoroscopy. Subjects were given a light liquid snack approximately 11  
92 hours before sample collection and fasted overnight for 10 hours prior to sample  
93 collection. At 0 hours, a mesalamine formulation was administered to each subject  
94 (Table 1). Luminal GI fluid samples (approximately 1.0 ml) were collected from up  
95 to four sites of the upper GI tract hourly up to 7 hours. Samples were collected by  
96 syringe, transferred to sterile tubes, and placed at -80°C until sample processing. A

97 paired sample was collected to detect pH using a calibrated micro pH electrode  
98 (Thermo Scientific (Waltham, MA) Orion pH probe catalog no. 9810BN).

### 99 **DNA extraction and Illumina MiSeq sequencing**

100 The detailed protocol for DNA extraction and Illumina MiSeq sequencing was  
101 followed as previously described with modifications (Supplemental Methods).<sup>26</sup>  
102 Briefly, 0.2 ml of GI fluid or 20 mg of stool was used for DNA isolation using a Qiagen  
103 (Germantown, MD) MagAttract Powermag microbiome DNA isolation kit (catalog  
104 no. 27500-4-EP). Barcoded dual-index primers specific to the V4 region of the 16S  
105 rRNA gene were used to amplify the DNA,<sup>27</sup> using a “touchdown PCR” protocol  
106 (Supplemental Methods). Multiple negative controls were run parallel to each PCR  
107 reaction. PCR reactions were normalized, pooled and quantified.<sup>28</sup> Libraries were  
108 prepared and sequenced using the 500 cycle MiSeq V2 Reagent kit (Illumina, San  
109 Diego, CA, catalog no. MS-102-2003). Raw FASTQ files, including those for negative  
110 controls, were deposited in the Sequence Read Archive database (BioProjectID:  
111 PRJNA495320; BioSampleIDs: SAMN10224451-SAMN10224634).

### 112 **Data processing and microbiota analysis**

113 Analysis of the V4 region of the 16S rRNA gene was done using mothur  
114 (v1.39.3).<sup>27,29</sup> Full methods, including detailed processing steps, raw processed data,  
115 and code for each analysis, are described in:  
116 [https://github.com/aseekatz/SI\\_mesalamine](https://github.com/aseekatz/SI_mesalamine). Briefly, following assembly, quality  
117 filtering, and trimming, reads were aligned to the SILVA 16S rRNA sequence  
118 database (v128).<sup>30</sup> Chimeric sequences were removed using UCHIME.<sup>31</sup> Prior to  
119 analysis, both mock and negative control samples (water) were assessed for

120 potential contamination; samples with < 2500 sequences were excluded (Table S1).  
121 Sequences were binned into operational taxonomic units (OTUs), 97% similarity,  
122 using the optclust algorithm.<sup>32</sup> The Ribosomal Database Project (v16) was used to  
123 classify OTUs or sequences directly for compositional analyses (> 80% confidence  
124 score).<sup>33</sup> Alpha and beta diversity measures (inverse Simpson index; the Yue &  
125 Clayton dissimilarity index,  $\theta_{YC}$ )<sup>34</sup> were calculated from unfiltered OTU data. Basic R  
126 commands were used to visualize results, calculate % OTUs shared between  
127 samples, and conduct statistics, using packages plyr, dplyr, gplots, tidyr, and  
128 tidyverse. The nonparametric Kruskal-Wallis test, using Dunn's test for multiple  
129 comparisons and adjusting *p*-values with the Benjamini-Hochberg method when  
130 indicated, was used for multi-group comparisons. The R packages lme4<sup>35</sup> and  
131 lmerTest<sup>36</sup> were used for mixed linear models between OTU relative abundance  
132 (filtered to include OTUs present in at least half of samples collected from a subject,  
133 per site) and pH or mesalamine.

134

## 135 **RESULTS**

### 136 **Study population**

137 Using a multi-channel catheter with multiple aspiration points,<sup>24</sup> samples  
138 collected from the upper GI tract of 8 healthy subjects during 10 different study  
139 visits were processed for 16S microbial community analysis (Supplemental  
140 Methods, Table 1, Table S1). Samples were collected hourly over the course of 7  
141 hours primarily from the proximal GI tract in the following possible locations: the  
142 stomach (n=44), duodenum (n=64), proximal/mid/distal jejunum (n=46), and stool



143 (n=3). At the beginning of the study, subjects were given one form of mesalamine  
144 (Table 1). One of the seven subjects was studied three times over the course of 10  
145 months; for most analyses, each study visit from this subject was considered  
146 independently.

147

### 148 **The proximal GI microbiota is dominated by Firmicutes and is distinct from** 149 **the fecal microbiota**

150 Analysis of the relative abundances of 16S rRNA-encoding genes from the GI  
151 tract across all timepoints and individuals demonstrated that the small intestinal  
152 microbiota was compositionally unique compared to stool (Fig. 1A). At all four sites  
153 in the proximal GI tract, Firmicutes composed the most abundant phyla (i.e.  
154 *Streptococcus*, *Veillonella*, and *Gemella* sp.). Higher levels of Bacteroidetes species  
155 (*Prevotella*) were detected in the stomach and duodenum. Proteobacteria and  
156 Actinobacteria predominated the remainder of the community at all sites. Diversity  
157 of the microbiota (inverse Simpson index) was decreased in sites of the upper GI  
158 tract compared to stool, which were enriched in Firmicutes (*Blautia*,  
159 Ruminococcaceae sp., and *Faecalibacterium*) and depleted in Bacteroidetes in these  
160 individuals (n=3) (Fig. 1B).

161

### 162 **The proximal GI microbiota is individualized and variable over time**

163 To compare the microbiota across the proximal GI tract within and across  
164 individuals, we assessed pairwise community dissimilarity using the Yue & Clayton  
165 dissimilarity index,  $\theta_{YC}$ , which takes into account relative abundance of OTU

166 compositional data. Both across (inter-individual) and within (intra-individual)  
167 subjects, stool was highly dissimilar to any proximal GI site (Figure 2A, 2B). Across  
168 proximal GI sites, subjects were more similar to their own samples than samples  
169 across other individuals (Figure 2A-D). The stomach microbiota was highly  
170 dissimilar across individuals compared to the duodenum or any part of the jejunum,  
171 which exhibited the least amount of dissimilarity (Figure 2C). A similar degree of  
172 dissimilarity was observed within an individual in the stomach, duodenum, and  
173 combined parts of the jejunum (Figure 2D).

174       Using a dissimilarity measure such as  $\theta_{YC}$  allows us to assess stability based  
175 on changes in the relative abundance of OTUs. It is possible that certain GI sites  
176 fluctuate more in total OTUs. To measure whether any site had a higher rate of flux  
177 in their community, i.e. a higher rate of OTU turnover, we calculated the % OTUs  
178 detected at a given timepoint from the total number of OTUs detected within that  
179 individual at a given site. We observed that for each proximal GI site, a mean of  
180 36.6% of the OTUs ever detected in that subject at a given site (mean number of  
181 total OTUs ever detected per subject per site = 135; range 78-212) were detectable  
182 at a given timepoint (Figure 3A). Similarly, we calculated the number of OTUs that  
183 were consistently present in all samples collected at that site within an individual  
184 (mean number of consistently detected OTUs per subject per site = 14.1; range 2-  
185 45). Overall, only 28.7% of the total OTUs ever detected at a given time point within  
186 an individual at a given site were represented by these consistently prevalent OTUs  
187 (Figure 3B). However, these prevalent OTUs explained an average of 72.0% of the  
188 relative abundance observed in the samples (Figure 3C). Of all sites, the relative

189 abundance explained by the individual's most prevalent OTUs in the stomach was  
190 lowest, followed by the duodenum, suggesting more variation at these sites  
191 compared to the jejunum (Kruskal-Wallis,  $p < 0.05$ ).

192 One subject (M046) returned three times over the course of 10 months,  
193 allowing us to compare long-term changes. Across the sites that were sampled  
194 during multiple visits (the duodenum and mid-jejunum), prevalent OTUs were still  
195 detected during all three visits, explaining 74.4% and 66.1% OTUs in the duodenum  
196 and mid-jejunum, respectively (Fig. S1).

197

### 198 **Large fluctuations in the duodenal microbiota are associated with pH but not** 199 **mesalamine**

200 We next investigated how these compositional trends changed over time  
201 across the subjects. We focused on the duodenum and stomach since these sites  
202 were highly sampled across and within individuals and demonstrated variable pH.  
203 In the duodenum, we observed large fluctuations in genus-level composition across  
204 hourly timepoints within individuals (Figure 4, Figure S2, S3). Specifically, the  
205 relative abundance of *Streptococcus*, *Prevotella*, and an unclassified Pasteurellaceae  
206 species fluctuated in all individuals. We hypothesized that these fluctuations could  
207 be driven by mesalamine, administered in different forms to each subject at study  
208 onset. However, no visible pattern was observed with mesalamine levels.  
209 Interestingly, we observed that these compositional changes tracked with pH  
210 fluctuations (Figure 4). These patterns were less apparent in the stomach, where  
211 individuals displayed variable dynamics and highly individualized compositional

212 patterns independent of mesalamine levels or pH, or in the jejunum of the subject  
213 with three different admissions, where pH fluctuated less (Figure S1, S2).

214 To identify whether any singular OTUs correlated with changes in pH, we  
215 applied a generalized linear mixed model approach that takes into account subject-  
216 specificity.<sup>37-39</sup> Within duodenal samples (n=56), we observed 15 OTUs that  
217 significantly correlated with pH changes. Linear regression of pH and relative  
218 abundance of these OTUs was significant across all samples (Figure 5; Table S2). Of  
219 the negatively correlated OTUs, six OTUs were classified as Bacteroidetes, mainly  
220 *Prevotella*, and two OTUs were classified as Pasteurellaceae sp. (Proteobacteria).  
221 The majority of the OTUs that were positively correlated with pH were Firmicutes,  
222 mainly *Streptococcus*, alongside an *Actinomyces* OTU (Actinobacteria). Only one OTU  
223 in the duodenum was significantly correlated to mesalamine (Table S2). We  
224 identified 17 OTUs that correlated with pH or mesalamine in the stomach; however,  
225 these were not representative at all sites (Table S2).

226

## 227 **DISCUSSION**

228 Our results demonstrate that the microbial communities inhabiting the GI  
229 tract are distinct and dynamic across different sites within the proximal GI tract. Our  
230 sampling procedure provided us with an opportunity to longitudinally characterize  
231 such microbial populations in conjunction with the administration of a commonly  
232 used drug, mesalamine. We observed high stability of the microbiota in the jejunum  
233 compared to the stomach or duodenum, indicating that the indigenous microbiota  
234 residing in more proximal regions of the GI tract may experience greater changes.

235 While we did not observe strong correlations between mesalamine concentration  
236 and particular microbiota members at any site, we did observe a strong correlation  
237 between the microbiota composition and pH, particularly in the duodenum.

238 In this report, we describe the use of a multi-lumen catheter design with  
239 unique aspiration ports that enabled sampling of small intestinal content over the  
240 course of seven hours.<sup>24</sup> Many studies aimed at investigating the microbiota of the  
241 proximal GI have overcome sampling difficulty in this region by using ileostoma  
242 effluent, samples from newly deceased individuals, or naso-ileal tubes. Although  
243 easy to access, ileostoma effluent does not fully recapitulate the distal small  
244 intestine, as it more closely resembles the colon than the small intestine due to  
245 increased oxygen concentrations near the stoma.<sup>40-43</sup> Single lumen naso-ileal tubes  
246 are unable to sample multiple sites simultaneously.<sup>18,20,21,44</sup> GI fluid collected with  
247 our methodology was sufficient for determining mesalamine concentration,  
248 assaying fluid pH, and isolating microbial DNA across time and GI sites, which has  
249 not been previously described.<sup>24</sup>

250 Our results support previous observations that the small intestine is dynamic  
251 with higher inter-individual than intra-individual variability.<sup>18,21,45</sup> However, the  
252 mid-distal small intestine also contains a resilient microbial community composed  
253 of several highly abundant OTUs. This resilience is demonstrated by the shift from  
254 an altered to a normal ileal microbiota following the resolution of an ileostoma.<sup>46</sup>  
255 This mirrors the colonic microbiota, which also has a small community which is  
256 stable over long periods of time.<sup>42,47,48</sup>

257 This and other studies have shown that the jejunal and proximal ileal  
258 microbiota are distinct from the colonic microbiota.<sup>10,49</sup> Despite changes in overall  
259 community structure and an overall decrease in microbial diversity across the  
260 stomach and small intestine compared stool, many of the same organisms  
261 commonly observed in stool were also present in the upper GI tract, albeit at very  
262 different abundances.<sup>10</sup> Interestingly, colonic resection and ileal pouch-anal  
263 anastomosis has been shown to shift the terminal ileum microbiota to a state similar  
264 to the colon, suggesting that a colonic community structure can develop at these  
265 sites given the right conditions.<sup>21,43,49-51</sup>

266 Many of the abundant microbes observed in our study, *Streptococcus*,  
267 *Veillonella*, *Gemella*, and Pasteurellaceae species, are also common residents of the  
268 oral cavity, which reflects the proximity of these locations in the GI tract.  
269 Populations of Proteobacteria, such as Pasteurellaceae, have also been observed  
270 consistently in the small intestinal microbiota in other studies, particularly in  
271 patients with IBD.<sup>14,52-54</sup> In our study, *Streptococcus* and *Veillonella* were correlated  
272 with pH in duodenal samples. It is possible that growth of these organisms drives a  
273 decrease in pH via metabolism of short-chain fatty acids, an observed functional  
274 capacity of these genera.<sup>21,55</sup> Conversely, large fluctuations in environmental pH  
275 may select for genera like *Streptococcus*, which have evolved a variety of  
276 mechanisms to control pH intracellularly.<sup>56-59</sup> In any case, our data suggests a  
277 relationship between microbial dynamics and environmental physiology of the  
278 duodenum, which is an important observation to consider when comparing this site  
279 across individuals.

280 We observed little association between mesalamine concentration and  
281 changes in microbial relative abundance in our cohort. Several studies have  
282 reported differences in the fecal microbiota of patients with or without IBD, in  
283 particular Crohn's disease, which can affect the small intestine.<sup>52</sup> Compositional  
284 shifts in the small intestine have been reported during IBD, specifically increased  
285 levels of Enterobacteriaceae species, such as *Enterococcus*, *Fusobacterium*, or  
286 *Haemophilus*.<sup>14,53,54</sup> It has been hypothesized that mesalamine's ability to reduce  
287 inflammation in patients with ulcerative colitis could be by altering the  
288 microbiota.<sup>22,23</sup> While acute effects of mesalamine on the microbiota have not  
289 previously been reported, earlier work has demonstrated that mesalamine  
290 decreases bacterial polyphosphate accumulation and pathogen fitness, suggesting  
291 an influence on the microbiota.<sup>23</sup> We did not observe strong correlations between  
292 mesalamine concentration and the microbiota here. However, our study was small,  
293 used different doses of mesalamine that may be metabolized differently across GI  
294 sites, and was conducted in healthy individuals.<sup>24</sup> It is possible that mesalamine is  
295 less likely to impact the small intestinal microbiota, which historically has lower  
296 efficacy in treating active Crohn's Disease, which manifests in the small intestine,  
297 compared to ulcerative colitis, which manifests in the large intestine.<sup>22,60,61</sup> As  
298 indicated by the variability of mesalamine in the subjects in this study, the effects of  
299 mesalamine on the small intestinal microbiota may be highly individualized.<sup>24,62-64</sup>  
300 Furthermore, individuals with disease may harbor a distinct microbiota that  
301 responds to mesalamine differently.

302           Despite the opportunity provided by our method to describe the microbiota  
303 across the GI tract, our study has some lingering questions. Movement by the subject  
304 during the study can result in movement of each sampling port, particularly  
305 between the distal stomach and antrum. This may explain the inconsistent pH  
306 values and severe fluctuations of the microbiota observed in the stomach. Similarly,  
307 the shorter length of the sampling device, as compared to a naso-ileal catheter,  
308 prevented reliable collection of fluid from the distal small intestine, limiting our  
309 sampling to the proximal region. We also were limited to three concurrent fecal  
310 samples, each of which was low in Bacteroidetes, a profile generally observed in  
311 individuals on low fat-high fiber, non-Western diets.<sup>65</sup>

312           The use of a novel catheter allowed us to assess the microbiota across several  
313 proximal GI sites overtime, representing a powerful clinical and/or investigative  
314 tool for studying the small intestinal microbiota. Future studies on the upper GI  
315 microbiota should collect concurrent oral swab/sputum and fecal samples to  
316 strengthen the ability to “track” microbial populations across the GI tract,  
317 potentiating our ability to correlate the microbiota from fecal sampling, a more  
318 convenient method to study the microbiota, to other sites of the GI tract.

319    **Declarations:**

320    **Acknowledgements:**

321           This research was funded by FDA grant HHSF223201000082C. Clinical  
322 samples collected with help from Michigan Institute for Clinical & Health Research  
323 (MICHR) NIH grant UL1TR000433. The authors would also like to thank the Host  
324 Microbiome Initiative and the Microbial Systems Molecular Biology Laboratory at



325 the University of Michigan for their support with the 16s rRNA sequencing, and  
326 Krishna Rao and Rose Putler for their assistance with the modelling and statistical  
327 analyses. This research was funded by the FDA(HHSF223201000082C) and the NIH  
328 (5U01AI124255-03).

329

330 **Availability of data and material:**

331 SRA: BioProjectID: PRJNA495320; BioSampleIDs: SAMN10224451-

332 SAMN10224634

333 GitHub: [https://github.com/aseekatz/SI\\_mesalamine](https://github.com/aseekatz/SI_mesalamine)

334

335 **Authors' contributions:**

336 MJK, DS, BEB, AMS, VBY, MKS - Conception or design of the work

337 MJK, BEB, WLH, JRB - Data collection

338 AMS, MJK, MKS - Data analysis and interpretation

339 MKS, AMS - Drafting the article

340 MKS, AMS, DS, VBY - Critical revision of the article

341 AMS, MKS, MJK, JRB, WLH, BEB, VBY, DS - Final approval of the version to be

342 published

343

344 **Ethics approval and consent to participate:**

345 Samples collected in this study were part of clinical trial NCT01999400. The

346 institutional review boards at the University of Michigan (IRBMED) and the

347 Department of Health and Human Services, Food and Drug Administration

348 (Research Involving Human Subjects Committee/RIHSC) both approved the study  
349 protocol. All subjects provided written informed consent in order to participate.

350 **Consent for publication:**

351 Not applicable

352

353 **Competing interests:**

354 None

355 **Table 1: Subject Recruitment.** Selected metadata and sample collections for 10  
356 admissions (subject M046 was admitted for three visits).

357

358 **Figure 1: Bacterial community relative abundance and diversity in the upper**

359 **GI tract. A)** The mean relative abundance of genera at each GI site (sample  $n$

360 indicated). **B)** Boxplots of the inverse Simpson Index measuring community

361 diversity across the GI tract (median, with first and third inter-quartile ranges).

362 Statistical analysis: Kruskal-Wallis test (ns).

363

364 **Figure 2: Dissimilarity of the proximal GI tract within and across individuals.**

365 Heatmap of the Yue & Clayton dissimilarity index,  $\theta_{YC}$ , comparing different proximal

366 GI sites and stool **A)** across individuals (inter-individual pairwise comparisons) and

367 **C)** within individuals (intra-individual pairwise comparisons). **C)** Inter-individual

368 and **D)** intra-individual dissimilarity in the stomach, duodenum, and jejunum (sites

369 combined). Statistical analysis: Kruskal-Wallis test (will add p values to graph).

370 Statistical analysis: Dunn's test for multiple comparisons with a Benjamini-

371 Hochberg p-value adjustment (\* $p < 0.01$ ; \*\* $p < 0.001$ ; \*\*\* $p < 0.0001$ ).

372

373 **Figure 3: Fluctuations in prevalent OTUs observed within an individual across**

374 **the proximal GI tract. A)** Boxplots of the percentage of OTUs detected in a given

375 sample out of all OTUs detected (all OTUs possible for that individual) at a subject-

376 site. **B)** Boxplots of the percentage of OTUs that were consistently detected at a

377 subject-site out of the total OTUs detected in a given sample. **C)** The percent of

378 relative abundance explained by prevalent OTUs at a subject-site in a given sample.

379 Statistical analysis: Kruskal-Wallis test.

380

381 **Figure 4: Longitudinal compositional dynamics, mesalamine levels, and pH in**  
382 **the duodenum.** Streamplots of genus-level composition over time in the duodenum  
383 of six individuals (% on left y-axis; genera coded in legend). White lines indicate pH  
384 measurements (black y-axis labels on right) and red lines indicate mesalamine  
385 concentration (red y-axis labels on right).

386

387 **Figure 5: Relative abundance of significant OTUs vs. pH.** Log relative abundance  
388 ( $\log(\text{RA})$ ) as a function of pH of OTUs found to be significantly correlated with pH  
389 using linear mixed models (all samples with measurable pH). Lines represent linear  
390 fit per OTU. OTUs classified as **A)** Firmicutes, **B)** Bacteroidetes, **C)** Proteobacteria,  
391 and **D)** Actinobacteria are depicted (genus-level OTU classification coded by  
392 legends).

393

394

395

396

## 397 REFERENCES

- 398 1 El Aidy, S., van den Bogert, B. & Kleerebezem, M. The small intestine  
399 microbiota, nutritional modulation and relevance for health. *Current Opinion*  
400 *in Biotechnology* **32**, 14-20, doi:10.1016/j.copbio.2014.09.005 (2015).
- 401 2 Poulakos, L. & Kent, T. H. Gastric Emptying and Small Intestinal Propulsion in  
402 Fed and Fasted Rats. *Gastroenterology* **64**, 962-967, doi:10.1016/S0016-  
403 5085(73)80008-3 (1973).
- 404 3 Ridlon, J. M., Kang, D. J., Hylemon, P. B. & Bajaj, J. S. Bile acids and the gut  
405 microbiome. *Current opinion in gastroenterology* **30**, 332-338,  
406 doi:10.1097/mog.000000000000057 (2014).
- 407 4 Araújo, J. R., Tomas, J., Brenner, C. & Sansonetti, P. J. Impact of high-fat diet on  
408 the intestinal microbiota and small intestinal physiology before and after the  
409 onset of obesity. *Biochimie* **141**, 97-106, doi:10.1016/j.biochi.2017.05.019  
410 (2017).
- 411 5 Martinez-Guryn, K. *et al.* Small Intestine Microbiota Regulate Host Digestive  
412 and Absorptive Adaptive Responses to Dietary Lipids. *Cell Host & Microbe* **23**,  
413 458-469.e455, doi:10.1016/j.chom.2018.03.011 (2018).
- 414 6 Flynn, K. J., Ruffin, M. T., Turgeon, D. K. & Schloss, P. D. Spatial Variation of the  
415 Native Colon Microbiota in Healthy Adults. *Cancer Prevention Research* **11**,  
416 393-402, doi:10.1158/1940-6207.Capr-17-0370 (2018).
- 417 7 Falony, G., Vieira-Silva, S. & Raes, J. Richness and ecosystem development  
418 across faecal snapshots of the gut microbiota. *Nature microbiology* **3**, 526-  
419 528, doi:10.1038/s41564-018-0143-5 (2018).
- 420 8 Sekirov, I., Russell, S. L., Antunes, L. C. M. & Finlay, B. B. Gut Microbiota in  
421 Health and Disease. *Physiological Reviews* **90**, 859-904,  
422 doi:10.1152/physrev.00045.2009 (2010).
- 423 9 Donaldson, G. P., Lee, S. M. & Mazmanian, S. K. Gut biogeography of the  
424 bacterial microbiota. *Nature Reviews Microbiology* **14**, 20,  
425 doi:10.1038/nrmicro3552 (2015).
- 426 10 Zmora, N. *et al.* Personalized Gut Mucosal Colonization Resistance to Empiric  
427 Probiotics Is Associated with Unique Host and Microbiome Features. *Cell*  
428 **174**, 1388-1405.e1321, doi:10.1016/j.cell.2018.08.041 (2018).
- 429 11 Hayashi, H., Takahashi, R., Nishi, T., Sakamoto, M. & Benno, Y. Molecular  
430 analysis of jejunal, ileal, caecal and recto-sigmoidal human colonic microbiota  
431 using 16S rRNA gene libraries and terminal restriction fragment length  
432 polymorphism. *Journal of medical microbiology* **54**, 1093-1101,  
433 doi:10.1099/jmm.0.45935-0 (2005).
- 434 12 Wang, M., Ahrné, S., Jeppsson, B. & Molin, G. Comparison of bacterial diversity  
435 along the human intestinal tract by direct cloning and sequencing of 16S  
436 rRNA genes. *FEMS Microbiology Ecology* **54**, 219-231,  
437 doi:10.1016/j.femsec.2005.03.012 (2005).
- 438 13 Wang, X., Heazlewood, S. P., Krause, D. O. & Florin, T. H. J. Molecular  
439 characterization of the microbial species that colonize human ileal and  
440 colonic mucosa by using 16S rDNA sequence analysis. *Journal of Applied*  
441 *Microbiology* **95**, 508-520, doi:10.1046/j.1365-2672.2003.02005.x (2003).

- 442 14 Dey, N., Soergel, D. A., Repo, S. & Brenner, S. E. Association of gut microbiota  
443 with post-operative clinical course in Crohn's disease. *BMC gastroenterology*  
444 **13**, 131, doi:10.1186/1471-230x-13-131 (2013).
- 445 15 Barrett, E. *et al.* Microbiota diversity and stability of the preterm neonatal  
446 ileum and colon of two infants. *MicrobiologyOpen* **2**, 215-225,  
447 doi:10.1002/mbo3.64 (2013).
- 448 16 Di Pilato, V. *et al.* The esophageal microbiota in health and disease. *Annals of*  
449 *the New York Academy of Sciences* **1381**, 21-33, doi:10.1111/nyas.13127  
450 (2016).
- 451 17 Verma, D., Garg, P. K. & Dubey, A. K. Insights into the human oral microbiome.  
452 *Archives of Microbiology* **200**, 525-540, doi:10.1007/s00203-018-1505-3  
453 (2018).
- 454 18 Booiijink, C. C. G. M. *et al.* High temporal and inter - individual variation  
455 detected in the human ileal microbiota. *Environmental Microbiology* **12**,  
456 3213-3227, doi:10.1111/j.1462-2920.2010.02294.x (2010).
- 457 19 den Bogert, B. v. *et al.* Diversity of human small intestinal Streptococcus and  
458 Veillonella populations. *FEMS Microbiology Ecology* **85**, 376-388,  
459 doi:10.1111/1574-6941.12127 (2013).
- 460 20 Angelakis, E. *et al.* A Metagenomic Investigation of the Duodenal Microbiota  
461 Reveals Links with Obesity. *PLOS ONE* **10**, e0137784,  
462 doi:10.1371/journal.pone.0137784 (2015).
- 463 21 Zoetendal, E. G. *et al.* The human small intestinal microbiota is driven by  
464 rapid uptake and conversion of simple carbohydrates. *The Isme Journal* **6**,  
465 1415, doi:10.1038/ismej.2011.212 (2012).
- 466 22 Hauso, Ø., Martinsen, T. C. & Waldum, H. 5-Aminosalicylic acid, a specific drug  
467 for ulcerative colitis. *Scandinavian journal of gastroenterology* **50**, 933-941,  
468 doi:10.3109/00365521.2015.1018937 (2015).
- 469 23 Dahl, J.-U. *et al.* The anti-inflammatory drug mesalamine targets bacterial  
470 polyphosphate accumulation. *Nature microbiology* **2**, 16267,  
471 doi:10.1038/nmicrobiol.2016.267 (2017).
- 472 24 Yu, A. *et al.* Measurement of in vivo Gastrointestinal Release and Dissolution  
473 of Three Locally Acting Mesalamine Formulations in Regions of the Human  
474 Gastrointestinal Tract. *Molecular Pharmaceutics* **14**, 345-358,  
475 doi:10.1021/acs.molpharmaceut.6b00641 (2017).
- 476 25 Committee, A. Q. A. I. E. *et al.* Multisociety guideline on reprocessing flexible  
477 gastrointestinal endoscopes: 2011. *Gastrointest Endosc* **73**, 1075-1084,  
478 doi:10.1016/j.gie.2011.03.1183 (2011).
- 479 26 Seekatz, A. M. *et al.* Fecal Microbiota Transplantation Eliminates Clostridium  
480 difficile in a Murine Model of Relapsing Disease. *Infection and immunity* **83**,  
481 3838-3846, doi:10.1128/IAI.00459-15 (2015).
- 482 27 Kozich, J. J., Westcott, S. L., Baxter, N. T., Highlander, S. K. & Schloss, P. D.  
483 Development of a dual-index sequencing strategy and curation pipeline for  
484 analyzing amplicon sequence data on the MiSeq Illumina sequencing  
485 platform. *Appl Environ Microbiol* **79**, 5112-5120, doi:10.1128/AEM.01043-13  
486 (2013).

- 487 28 Kozich, J. J., Westcott, S. L., Baxter, N. T., Highlander, S. K. & Schloss, P. D.  
488 Development of a dual-index sequencing strategy and curation pipeline for  
489 analyzing amplicon sequence data on the MiSeq Illumina sequencing  
490 platform. *Appl Environ Microbiol* **79**, doi:10.1128/aem.01043-13 (2013).
- 491 29 Schloss, P. D. *et al.* Introducing mothur: open-source, platform-independent,  
492 community-supported software for describing and comparing microbial  
493 communities. *Appl Environ Microbiol* **75**, 7537-7541,  
494 doi:10.1128/AEM.01541-09 (2009).
- 495 30 Pruesse, E. *et al.* SILVA: a comprehensive online resource for quality checked  
496 and aligned ribosomal RNA sequence data compatible with ARB. *Nucleic  
497 Acids Res* **35**, 7188-7196, doi:10.1093/nar/gkm864 (2007).
- 498 31 Edgar, R. C., Haas, B. J., Clemente, J. C., Quince, C. & Knight, R. UCHIME  
499 improves sensitivity and speed of chimera detection. *Bioinformatics* **27**,  
500 2194-2200, doi:10.1093/bioinformatics/btr381 (2011).
- 501 32 Westcott, S. L. & Schloss, P. D. OptiClust, an Improved Method for Assigning  
502 Amplicon-Based Sequence Data to Operational Taxonomic Units. *mSphere* **2**,  
503 doi:10.1128/mSphereDirect.00073-17 (2017).
- 504 33 Cole, J. R. *et al.* The Ribosomal Database Project: improved alignments and  
505 new tools for rRNA analysis. *Nucleic Acids Res* **37**, D141-145,  
506 doi:10.1093/nar/gkn879 (2009).
- 507 34 Yue, J. C. & Clayton, M. K. A Similarity Measure Based on Species Proportions.  
508 *Communications in Statistics - Theory and Methods* **34**, 2123-2131,  
509 doi:10.1080/STA-200066418 (2005).
- 510 35 Bates, D., Mächler, M., Bolker, B. & Walker, S. Fitting Linear Mixed-Effects  
511 Models Using lme4. *Journal of Statistical Software; Vol 1, Issue 1 (2015)*  
512 (2015).
- 513 36 Kuznetsova, A., Brockhoff, P. B. & Christensen, R. H. B. lmerTest Package:  
514 Tests in Linear Mixed Effects Models. *Journal of Statistical Software; Vol 1,  
515 Issue 13 (2017) (2017)*.
- 516 37 Xia, Y. & Sun, J. Hypothesis testing and statistical analysis of microbiome.  
517 *Genes & Diseases* **4**, 138-148, doi:10.1016/j.gendis.2017.06.001 (2017).
- 518 38 Gajer, P. *et al.* Temporal dynamics of the human vaginal microbiota. *Sci Transl  
519 Med* **4**, 132ra152, doi:10.1126/scitranslmed.3003605 (2012).
- 520 39 Mehta, S. D. *et al.* The vaginal microbiota over an 8- to 10-year period in a  
521 cohort of HIV-infected and HIV-uninfected women. *PLoS One* **10**, e0116894,  
522 doi:10.1371/journal.pone.0116894 (2015).
- 523 40 Heimesaat, M. M. *et al.* Comprehensive Postmortem Analyses of Intestinal  
524 Microbiota Changes and Bacterial Translocation in Human Flora Associated  
525 Mice. *PLoS ONE* **7**, e40758, doi:10.1371/journal.pone.0040758 (2012).
- 526 41 DeBruyn, J. M. & Hauther, K. A. Postmortem succession of gut microbial  
527 communities in deceased human subjects. *PeerJ* **5**, e3437,  
528 doi:10.7717/peerj.3437 (2017).
- 529 42 Fukuyama, J. *et al.* Multidomain analyses of a longitudinal human microbiome  
530 intestinal cleanout perturbation experiment. *PLOS Computational Biology* **13**,  
531 e1005706, doi:10.1371/journal.pcbi.1005706 (2017).

- 532 43 Young, V. B. *et al.* Multiphasic analysis of the temporal development of the  
533 distal gut microbiota in patients following ileal pouch anal anastomosis.  
534 *Microbiome* **1**, 9, doi:10.1186/2049-2618-1-9 (2013).
- 535 44 Muller-Lissner, S. A. *et al.* Effect of gastric and transpyloric tubes on gastric  
536 emptying and duodenogastric reflux. *Gastroenterology* **83**, 1276 (1982).
- 537 45 Onishi, J. C. *et al.* Bacterial communities in the small intestine respond  
538 differently to those in the caecum and colon in mice fed low- and high-fat  
539 diets. *Microbiology (Reading, England)* **163**, 1189-1197,  
540 doi:10.1099/mic.0.000496 (2017).
- 541 46 Hartman, A. L. *et al.* Human gut microbiome adopts an alternative state  
542 following small bowel transplantation. *Proceedings of the National Academy  
543 of Sciences of the United States of America* **106**, 17187-17192,  
544 doi:10.1073/pnas.0904847106 (2009).
- 545 47 Caporaso, J. G. *et al.* Moving pictures of the human microbiome. *Genome  
546 Biology* **12**, R50, doi:10.1186/gb-2011-12-5-r50 (2011).
- 547 48 Dethlefsen, L. & Relman, D. A. Incomplete recovery and individualized  
548 responses of the human distal gut microbiota to repeated antibiotic  
549 perturbation. *Proceedings of the National Academy of Sciences* **108**, 4554-  
550 4561, doi:10.1073/pnas.1000087107 (2011).
- 551 49 Villmones, H. C. *et al.* Species Level Description of the Human Ileal Bacterial  
552 Microbiota. *Scientific Reports* **8**, 4736, doi:10.1038/s41598-018-23198-5  
553 (2018).
- 554 50 Hinata, M. *et al.* A Shift from Colon- to Ileum-Predominant Bacteria in Ileal-  
555 Pouch Feces Following Total Proctocolectomy. *Digestive diseases and sciences*  
556 **57**, 2965-2974, doi:10.1007/s10620-012-2165-9 (2012).
- 557 51 Maharshak, N. *et al.* Alterations of Enteric Microbiota in Patients with a  
558 Normal Ileal Pouch Are Predictive of Pouchitis. *Journal of Crohn's and Colitis*  
559 **11**, 314-320, doi:10.1093/ecco-jcc/jjw157 (2017).
- 560 52 Harris, K. G. & Chang, E. B. The intestinal microbiota in the pathogenesis of  
561 inflammatory bowel diseases: new insights into complex disease. *Clinical  
562 science (London, England : 1979)* **132**, 2013-2028, doi:10.1042/cs20171110  
563 (2018).
- 564 53 De Cruz, P. *et al.* Association between specific mucosa-associated microbiota  
565 in Crohn's disease at the time of resection and subsequent disease  
566 recurrence: a pilot study. *J Gastroenterol Hepatol* **30**, 268-278,  
567 doi:10.1111/jgh.12694 (2015).
- 568 54 Gevers, D. *et al.* The treatment-naive microbiome in new-onset Crohn's  
569 disease. *Cell Host Microbe* **15**, 382-392, doi:10.1016/j.chom.2014.02.005  
570 (2014).
- 571 55 Pancholi, V. & Caparon, C. in *Streptococcus pyogenes : Basic Biology to Clinical  
572 Manifestations* (eds J. J. Ferretti, D. L. Stevens, & V. A. Fischetti) Ch.  
573 *Streptococcus pyogenes Metabolism*, (University of Oklahoma Health  
574 Sciences Center  
575 (c) The University of Oklahoma Health Sciences Center., 2016).



- 576 56 Scott, K. P., Gratz, S. W., Sheridan, P. O., Flint, H. J. & Duncan, S. H. The  
577 influence of diet on the gut microbiota. *Pharmacological Research* **69**, 52-60,  
578 doi:10.1016/j.phrs.2012.10.020 (2013).
- 579 57 Abuhelwa, A. Y., Williams, D. B., Upton, R. N. & Foster, D. J. R. Food,  
580 gastrointestinal pH, and models of oral drug absorption. *European Journal of*  
581 *Pharmaceutics and Biopharmaceutics* **112**, 234-248,  
582 doi:10.1016/j.ejpb.2016.11.034 (2017).
- 583 58 Lund, P., Tramonti, A. & De Biase, D. Coping with low pH: molecular strategies  
584 in neutralophilic bacteria. *FEMS Microbiology Reviews* **38**, 1091-1125,  
585 doi:10.1111/1574-6976.12076 (2014).
- 586 59 Bradshaw, D. & Marsh, P. D. Analysis of pH-Driven Disruption of Oral  
587 Microbial Communities in vitro. *Caries Research* **32**, 456-462 (1998).
- 588 60 Wright, E. K. *et al.* Recent Advances in Characterizing the Gastrointestinal  
589 Microbiome in Crohn's Disease: A Systematic Review. *Inflammatory bowel*  
590 *diseases* **21**, 1219-1228, doi:10.1097/MIB.0000000000000382 (2015).
- 591 61 Lim, W. C., Wang, Y., MacDonald, J. K. & Hanauer, S. Aminosalicylates for  
592 induction of remission or response in Crohn's disease. *The Cochrane database*  
593 *of systematic reviews* **7**, Cd008870, doi:10.1002/14651858.CD008870.pub2  
594 (2016).
- 595 62 Allocca, M. *et al.* Effectiveness of Mesalazine, Thiopurines and Tumour  
596 Necrosis Factor Antagonists in Preventing Post-Operative Crohn's Disease  
597 Recurrence in a Real-Life Setting. *Digestion* **96**, 166-172 (2017).
- 598 63 Hanauer, S. B. *et al.* Postoperative maintenance of Crohn's disease remission  
599 with 6-mercaptopurine, mesalamine, or placebo: A 2-year trial.  
600 *Gastroenterology* **127**, 723-729, doi:10.1053/j.gastro.2004.06.002 (2004).
- 601 64 Singh, S. & Nguyen, G. C. Management of Crohn's Disease After Surgical  
602 Resection. *Gastroenterology clinics of North America* **46**, 563-575,  
603 doi:10.1016/j.gtc.2017.05.011 (2017).
- 604 65 Smits, S. A. *et al.* Seasonal cycling in the gut microbiome of the Hadza hunter-  
605 gatherers of Tanzania. *Science* **357**, 802-806, doi:10.1126/science.aan4834  
606 (2017).  
607

| Subject ID*    | Mesalamine Formulation†    | Age            | BMI            | Sex          | Stomach   | Duodenum  | Jejunum   |           |          | Stool    | Total      |
|----------------|----------------------------|----------------|----------------|--------------|-----------|-----------|-----------|-----------|----------|----------|------------|
|                |                            |                |                |              |           |           | Proximal  | Mid       | Distal   |          |            |
| M046-A         | Pentasa                    | 38             | 21.2           | M            | 1         | 8         | -         | 7         | -        | 1        | 17         |
| M046-B         | Apriso                     | 38             | 21.3           | M            | -         | 8         | -         | 5         | 6        | -        | 19         |
| M046-C         | Lialda                     | 38             | 21.7           | M            | 8         | 6         | -         | 7         | -        | 1        | 22         |
| M047           | Pentasa                    | 36             | 21.1           | M            | -         | 8         | 6         | -         | -        | -        | 14         |
| M048           | Apriso                     | 51             | 34.3           | F            | 5         | 7         | -         | -         | -        | -        | 12         |
| M053           | Apriso                     | 34             | 25.2           | F            | 1         | -         | 7         | 3         | -        | -        | 11         |
| M061           | Pentasa                    | 51             | 21.6           | M            | 7         | 8         | -         | -         | -        | -        | 15         |
| M062           | Pentasa                    | 37             | 27.3           | M            | 7         | 7         | -         | -         | -        | 1        | 15         |
| M063           | Lialda                     | 26             | 28.6           | M            | 7         | 5         | -         | 5         | -        | -        | 17         |
| M064           | Lialda                     | 25             | 27.5           | F            | 8         | 7         | -         | -         | -        | -        | 15         |
| <b>Summary</b> | <b>40% P, 30% A, 30% L</b> | <b>37 ±8.6</b> | <b>25 ±4.4</b> | <b>70% M</b> | <b>44</b> | <b>64</b> | <b>13</b> | <b>27</b> | <b>6</b> | <b>3</b> | <b>157</b> |

\*All subjects were caucasian and none identified as hispanic/latinx.

†Pentasa = Immediate release in stomach acid; Apriso = Extended release at pH > 6; Lialda = Extended release at pH > 7

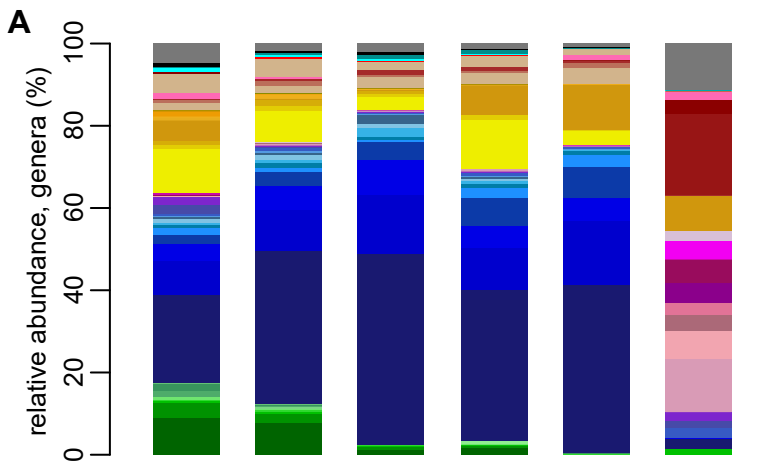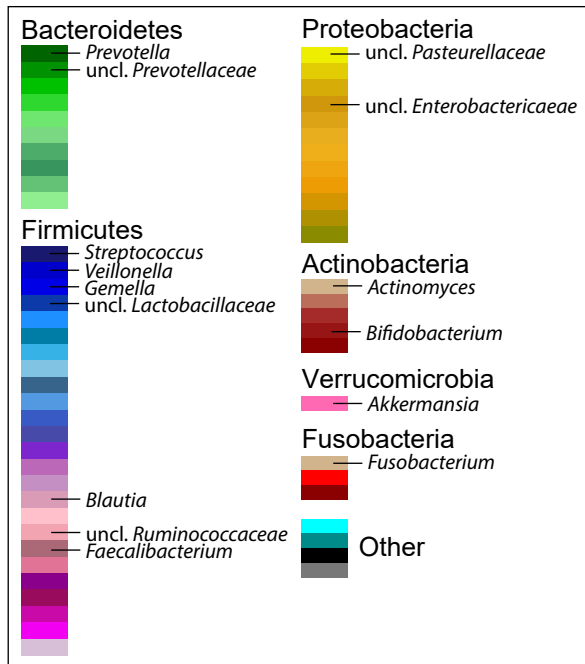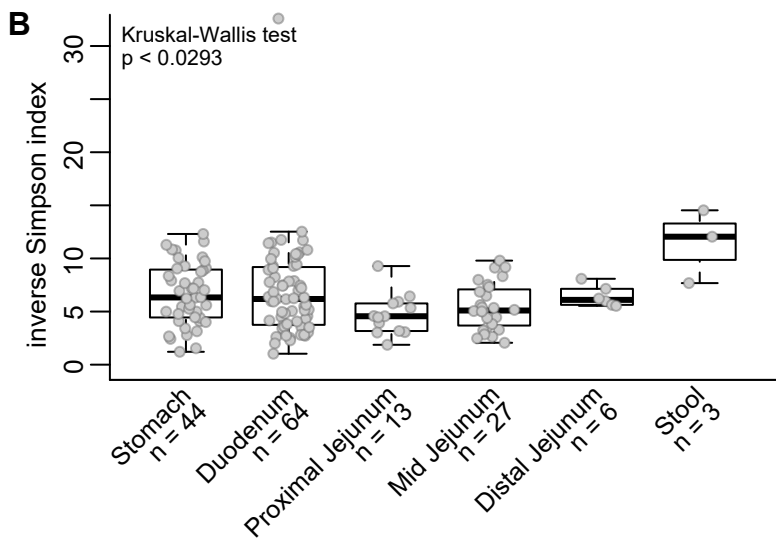

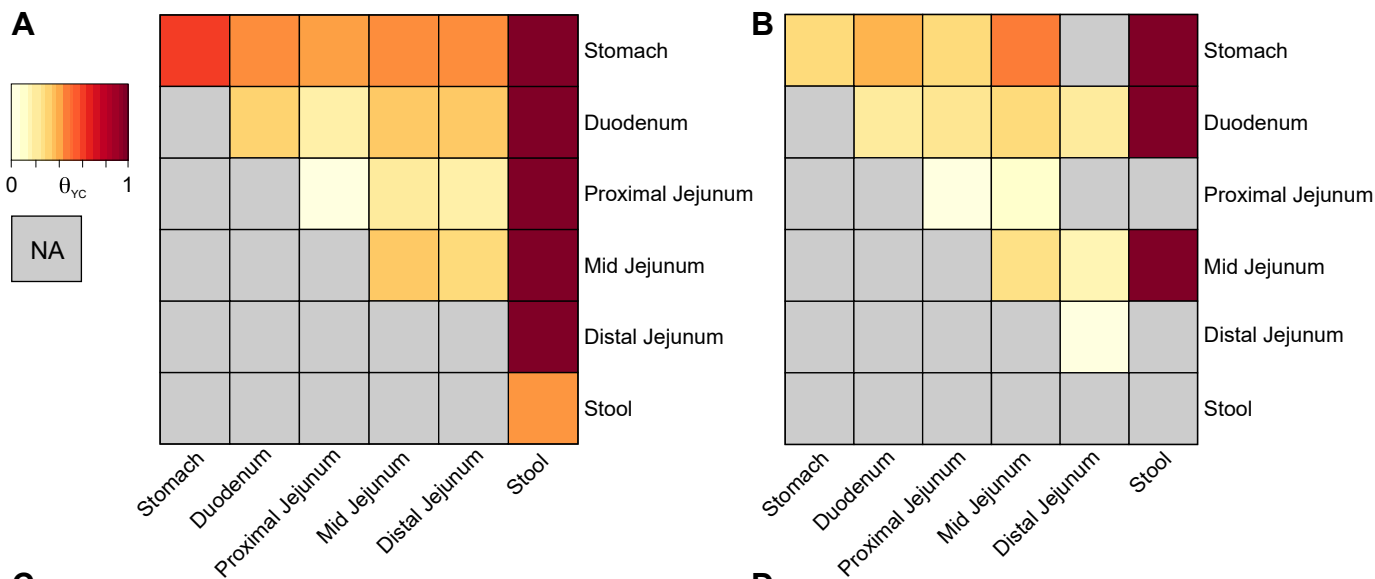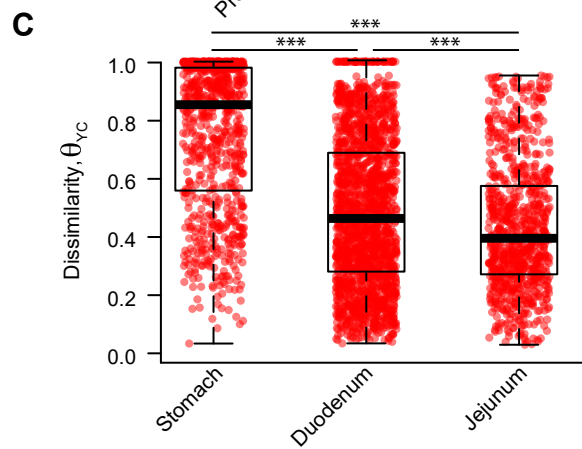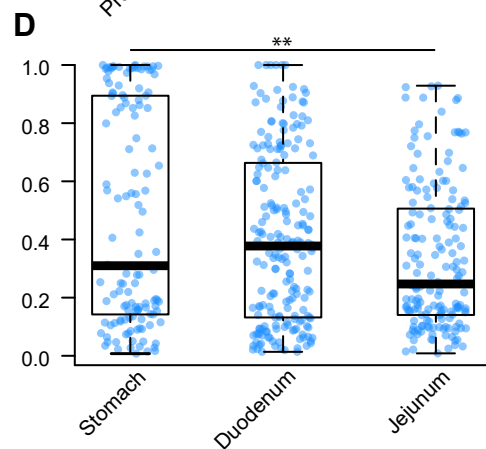

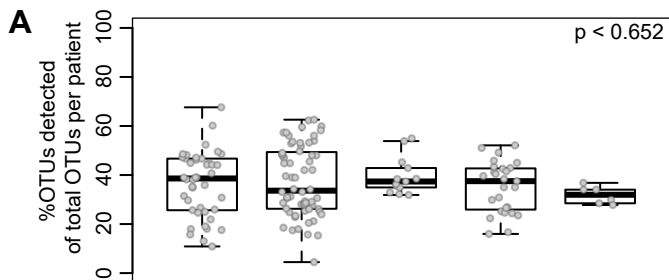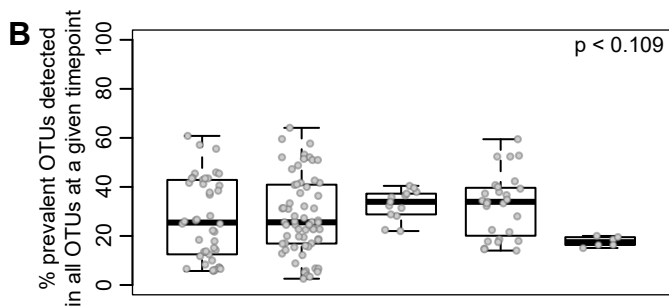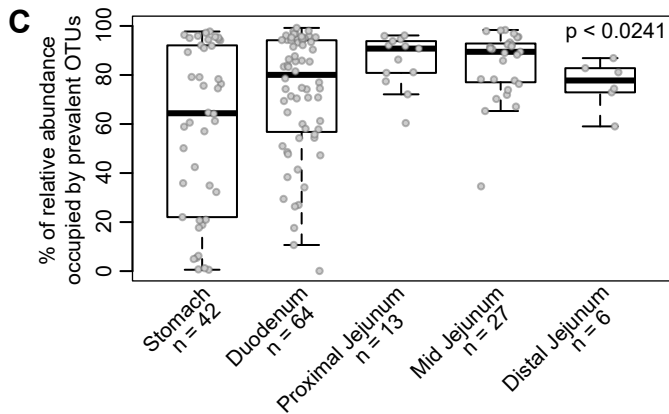

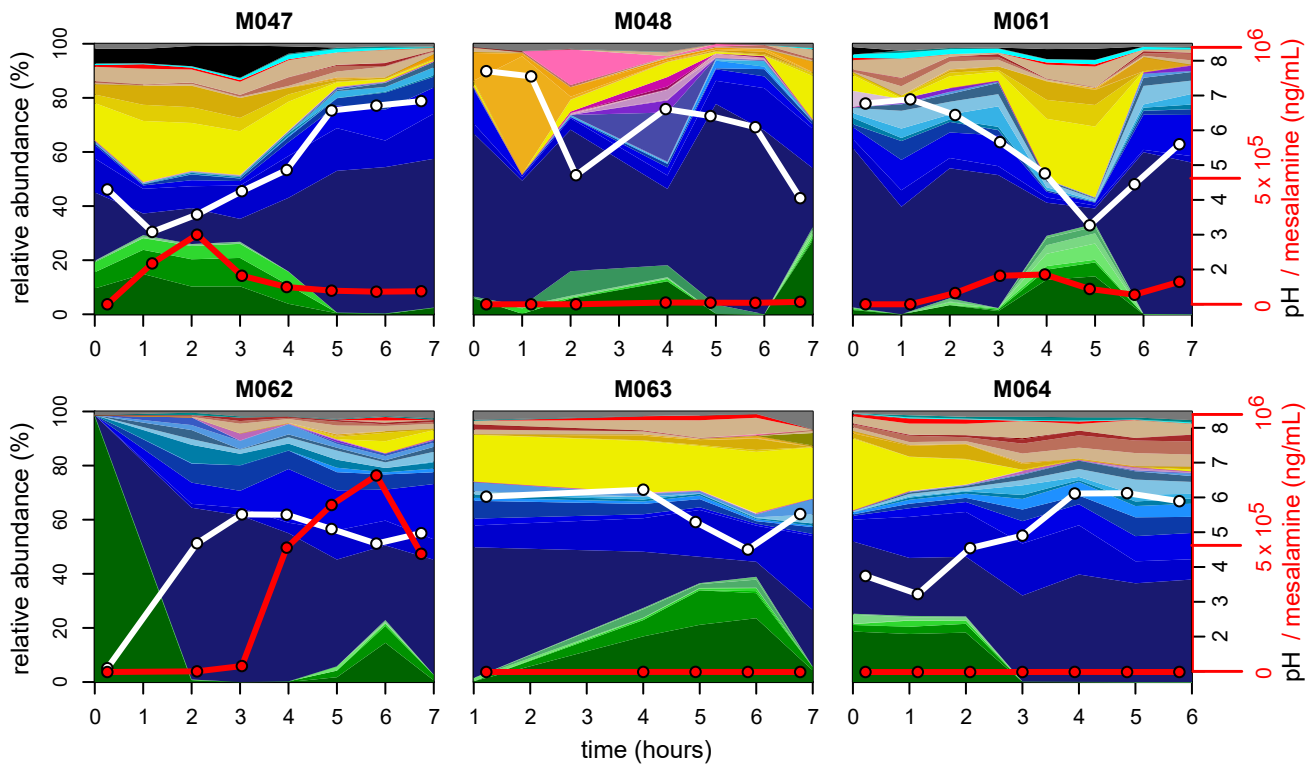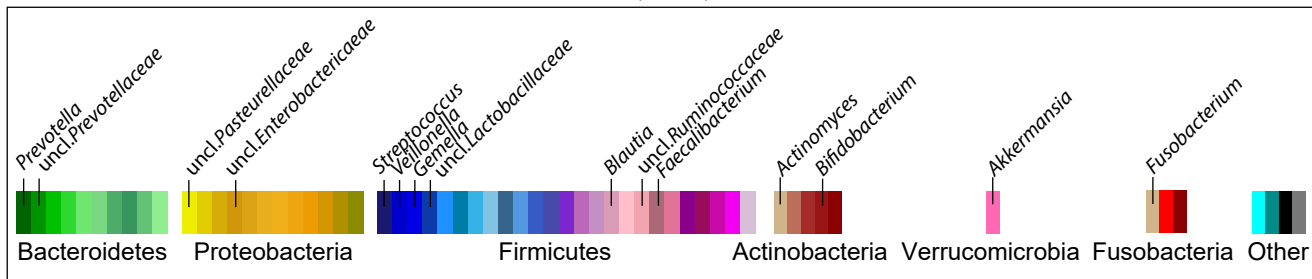

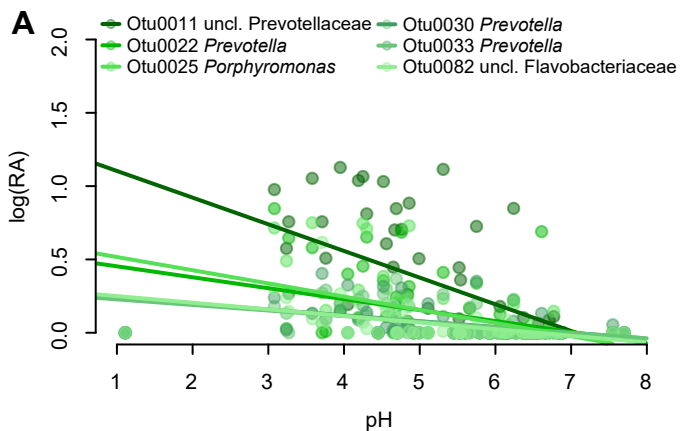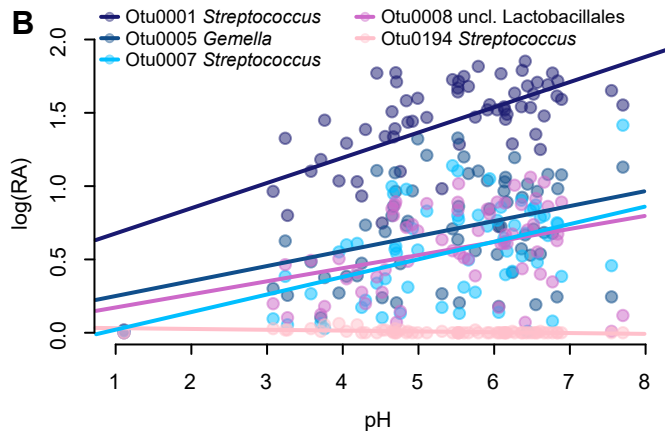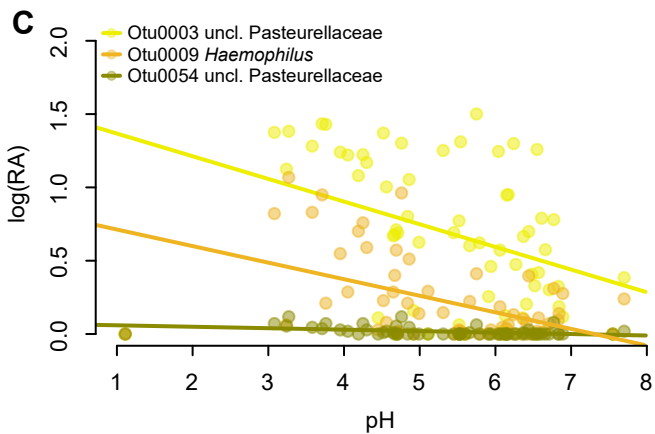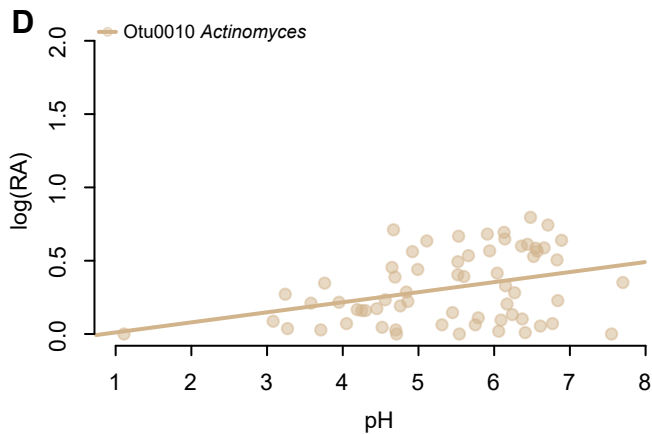

Source: https://www.biorxiv.org/content/10.1101/450221v1.full.pdf
